# Supplementary material for: Collective predator evasion: Putting the criticality hypothesis to the test
Source: PubMed Central journal article supplement (PMC7993868; doi:10.1371/journal.pcbi.1008832), 2021-03-15
Supplement: pcbi.1008832.s014.pdf [file pcbi.1008832.s014.pdf]

|          | parameter            | symbol                 | value   |
|----------|----------------------|------------------------|---------|
| prey     | angular diffusion    | $D$                    | 0.5     |
|          | alignment strength   | $\theta_{\text{alg}}$  | evolves |
|          | distance strength    | $\theta_{\text{d}}$    | 2       |
|          | distance steepness   | $m_{\text{d}}$         | 2       |
|          | (distance preferred) | $r_{\text{d}}$         | 1       |
|          | (speed)              | $v_0$                  | 1       |
|          | flee strength        | $\theta_{\text{flee}}$ | 4       |
| predator | speed                | $v_{\text{p}}$         | 2       |
|          | pursuit strength     | $\theta_{\text{p}}$    | 2       |
|          | attack rate          | $\Upsilon_{\text{a}}$  | 1/3     |
|          | catch radius         | $r_{\text{catch}}$     | 3       |
| simul.   | number of agents     | $N$                    | 400     |
|          | time step            | $dt$                   | 0.02    |
|          | equilibration time   | $T_{\text{eq}}$        | 200     |
|          | simulation time      | $T_{\text{simu}}$      | 120     |
|          | mutation rate        | $\Upsilon_{\text{m}}$  | 0.8     |
|          | mutation strength    | $\sigma_{\text{m}}$    | 0.075   |
